# Supplementary material for: Vapour pressure and mixing thermodynamic properties of the KNbO3–NaNbO3system
Source: Royal Society of Chemistry journal article supplement (doi:10.1039/c5ra11874c), 2015-01-01
Supplement: c5ra11874c1.pdf [file c5ra11874c1.pdf]

## Supplemental material

Table S-I. Column 3 and 4; Measured K<sup>+</sup> and Na<sup>+</sup> ion intensities at specified time and temperature. Column 5 and 6; Sodium and potassium pressures calculated using Eq. 1.

| $(T / \text{K})$ | $t / \text{min}$ | $(I_{\text{K}}^+ / \text{s}^{-1})$ | $(I_{\text{Na}}^+ / \text{s}^{-1})$ | $(p_{\text{K(g)}} / \text{Pa})$ | $(p_{\text{Na(g)}} / \text{Pa})$ |
|------------------|------------------|------------------------------------|-------------------------------------|---------------------------------|----------------------------------|
| 1163             | 0                | 125000                             | 8000                                | 0.06570                         | 0.00755                          |
| 1163             | 14               | 95000                              | 4200                                | 0.04994                         | 0.00397                          |
| 1163             | 21               | 84000                              | 3300                                | 0.04415                         | 0.00312                          |
| 1163             | 37               | 70000                              | 2500                                | 0.03679                         | 0.00236                          |
| 1163             | 60               | 58000                              | 1500                                | 0.03049                         | 0.00142                          |
| 1163             | 625              | 9500                               | 312                                 | 0.00499                         | 0.00029                          |
| 1163             | 1260             | 4800                               | 250                                 | 0.00252                         | 0.00024                          |
| 1263             | 1283             | 57000                              | 2700                                | 0.03254                         | 0.00277                          |
| 1263             | 1302             | 46000                              | 2770                                | 0.02626                         | 0.00284                          |
| 1263             | 1364             | 39000                              | 2850                                | 0.02226                         | 0.00292                          |
| 1263             | 1403             | 31000                              | 2800                                | 0.01770                         | 0.00287                          |
| 1263             | 1594             | 21000                              | 2800                                | 0.01199                         | 0.00287                          |
| 1263             | 2042             | 15000                              | 2850                                | 0.00856                         | 0.00292                          |
| 1263             | 2715             | 14000                              | 2900                                | 0.00799                         | 0.00297                          |

Table S-II. Raw data for a selected measurement of the KNN20/80 sample.

| $T/^{\circ}\text{C}$ | $T/\text{K}$ | $10^3/(T/\text{K})$ | $I_{\text{Na}^+}$ | $I_{\text{K}^+}$ | $\ln(I_{\text{K}^+} / I_{\text{Na}^+})$ |
|----------------------|--------------|---------------------|-------------------|------------------|-----------------------------------------|
| 1020                 | 1293         | 0.773               | 3130              | 4800             | 0.428                                   |
| 1010                 | 1283         | 0.779               | 2648              | 3650             | 0.321                                   |
| 1000                 | 1273         | 0.786               | 2021              | 2655             | 0.273                                   |
| 990                  | 1263         | 0.792               | 1486              | 2003             | 0.299                                   |
| 980                  | 1253         | 0.798               | 1177              | 1555             | 0.279                                   |
| 970                  | 1243         | 0.805               | 835               | 1100             | 0.276                                   |
| 960                  | 1233         | 0.811               | 630               | 790              | 0.226                                   |
| 950                  | 1223         | 0.818               | 510               | 645              | 0.235                                   |
| 940                  | 1213         | 0.824               | 373               | 464              | 0.218                                   |
| 930                  | 1203         | 0.831               | 287               | 364              | 0.238                                   |
| 920                  | 1193         | 0.838               | 198               | 242              | 0.201                                   |
| 925                  | 1198         | 0.835               | 217               | 270              | 0.219                                   |
| 935                  | 1208         | 0.828               | 277               | 332              | 0.181                                   |
| 945                  | 1218         | 0.821               | 353               | 435              | 0.209                                   |
| 955                  | 1228         | 0.814               | 484               | 611              | 0.233                                   |
| 965                  | 1238         | 0.808               | 694               | 881              | 0.239                                   |
| 975                  | 1248         | 0.801               | 919               | 1225             | 0.287                                   |
| 985                  | 1258         | 0.795               | 1206              | 1625             | 0.298                                   |
| 995                  | 1268         | 0.789               | 1636              | 2175             | 0.285                                   |
| 1005                 | 1278         | 0.782               | 2128              | 2950             | 0.327                                   |
| 1015                 | 1288         | 0.776               | 2846              | 3986             | 0.337                                   |
| 1025                 | 1298         | 0.770               | 3580              | 5147             | 0.363                                   |
| 1035                 | 1308         | 0.765               | 4659              | 6484             | 0.331                                   |
